# Supplementary material for: Effects of interfacial specific cations and water molarities on AOT micelle-to-vesicle transitions by chemical trapping: the specific ion-pair/hydration model
Source: Royal Society of Chemistry journal article supplement (doi:10.1039/c8cp05987j), 2019-01-01
Supplement: c8cp05987j1.pdf [file c8cp05987j1.pdf]

## Electronic Supporting Information

### Effects of Interfacial Specific Cation and Water Molarities on AOT Micelle-to-Vesicle Transitions by Chemical Trapping: The Specific Ion-Pair/Hydration Model

Changyao Liu,<sup>1</sup> Yuzhao Wang,<sup>1</sup> Yanfei Gao,<sup>1</sup> Yongliang Zhang,<sup>2</sup> Li Zhao,<sup>1</sup> Baocai Xu,<sup>\*1</sup> and Laurence S. Romsted<sup>\*2</sup>

<sup>1</sup>School of Food and Chemical Engineering, Beijing Technology and Business University, No. 11 Fucheng Road, Beijing, 100048, People's Republic of China

<sup>2</sup>Department of Chemistry and Chemical Biology, Rutgers, The State University of New Jersey 610 Taylor Road Piscataway, New Jersey 08854

#### Table of Contents

|                                                                                               |   |
|-----------------------------------------------------------------------------------------------|---|
| S1. Synthesis of 16-ArS                                                                       | 1 |
| S2. Standard curves for the calculation of AOT <sub>m</sub> and H <sub>2</sub> O <sub>m</sub> | 2 |
| S3. Calibration curves for calculating dediazonation product yields                           | 3 |
| S4. Chemical trapping data Tables S2 to S19                                                   | 3 |

**S1. Synthesis of bis(2-ethylhexyl) 2-((4-hexadecyl-2,6-dimethylphenoxy)sulfonyl)succinate, 16-ArS.** 16-ArS was prepared by trapping of 16-ArN<sub>2</sub><sup>+</sup> by AOT, modification of the method of Chaudhuri and Srilakshmi.<sup>1</sup> The dediazonation reaction was carried out in a mixture of 15 mM AOT, 20 mM TBAB, and 1 mM HCl. 150 mL 25 mM AOT solution, 5 mL 1 M TBAB, and 2.5 mL 0.1 M HCl were mixed in a 250 mL flask. 67 mg long-chain probe 16-ArN<sub>2</sub>BF<sub>4</sub> was dissolved in 5 mL ice-cold MeCN, and added to the mixture. The reaction mixture was stirred for 2 days at room temperature in dark. The mixture was extracted with EtOAc (3 x 250 mL). The organic layer was isolated, and EtOAc was removed by rotatory evaporation. The crude product was purified by HPLC with a 65% MeOH/35% *i*-PrOH (v/v) mobile phase. <sup>1</sup>H NMR (CDCl<sub>3</sub>) (PPM): 0.88 (15H, t), 1.26 (42H, m), 1.58-1.69 (4H, m), 2.34 (6H, s), 2.48 (2H, t), 3.33-3.56 (2H, 2dd), 4.08-4.25 (5H, d), 6.86 (2H, s), **Figure S1**.

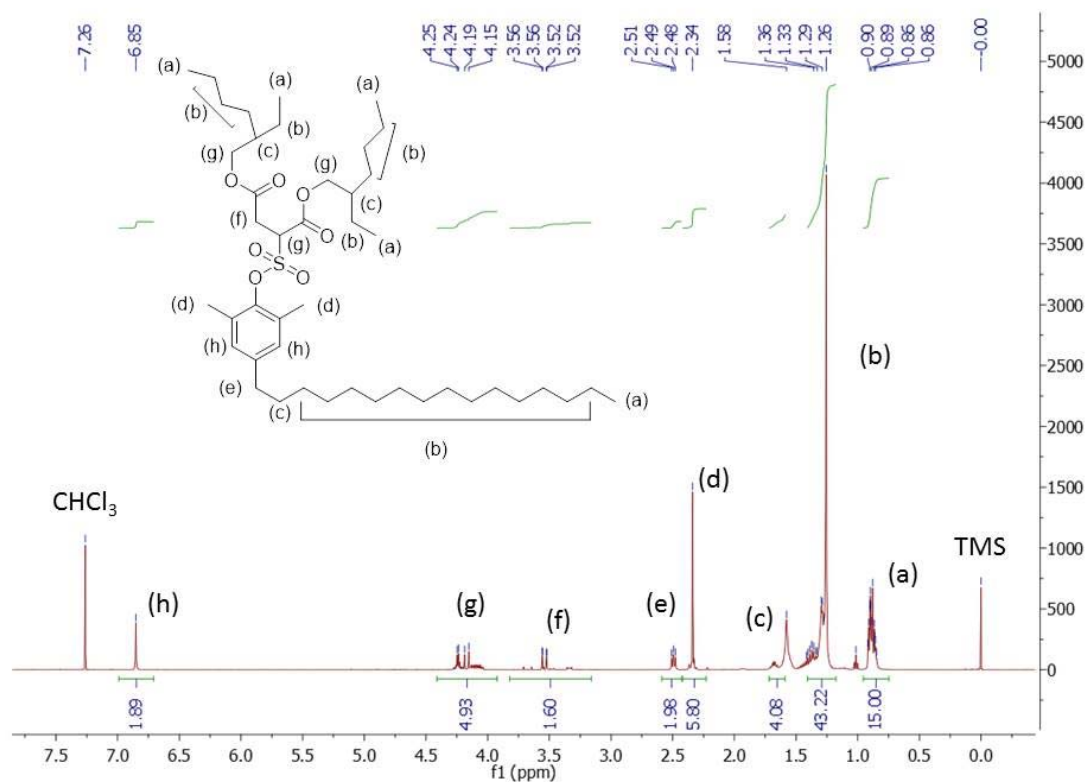

**Figure S1.**  $^1\text{H}$  NMR spectrum of 16-ArS at 500 MHz in  $\text{CDCl}_3$ . Note: f1 =  $\delta$ .

## S2. Standard curves used for the calculation of $\text{AOT}_m$ and $\text{H}_2\text{O}_m$

The chemical trapping reactions with short-chain probe  $1\text{-ArN}_2^+$  in aqueous sodium dimethylsulfosuccinate, SDSS (**Scheme S1**), solutions were carried out by Chaudhuri and Srilakshmi and used for the preparation of standard curves used for the calculation of  $\text{AOT}_m$  and  $\text{H}_2\text{O}_m$ , Equation **S1** and **S2**.<sup>1</sup>

$$\%16\text{-ArS} = 9.036[\text{AOT}_m] (\text{M}) - 0.103 \quad (\text{S1})$$

$$\%16\text{-ArOH} = 0.914[\text{H}_2\text{O}_m] (\text{M}) + 49.72 \quad (\text{S2})$$

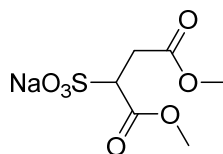

**Scheme S1.** Chemical structure of sodium dimethylsulfosuccinate (SDSS)

### S3. Calibration curves for the calculation of dediazonation product yields

**Table S1.** Linear calibration equations for long-chain dediazonation products.<sup>a</sup>

| Reaction Products | Calibration Equations <sup>b</sup>   | R <sup>2</sup> |
|-------------------|--------------------------------------|----------------|
| 16-ArOH           | $y = 10.00 \times 10^{10} x - 28660$ | 0.9998         |
| 16-ArS            | $y = 1.380 \times 10^{11} x$         | 1.0000         |

- a. HPLC Eluting solvent: 35%/65% v/v, *i*-PrOH/MeOH. Flow rate: 0.4 mL/min. Detector wavelength: 220 nm. Injection volume: 100  $\mu$ L.
- b. Units: y-peak area (in  $\mu$ v's), x-concentration (in molarity), and R<sup>2</sup>.

### S4. Chemical trapping data

**Tables S2-S20** list the average peak areas, observed product yields, and normalized product yields for dediazonation reaction of 16-ArN<sub>2</sub><sup>+</sup> in solutions of 15 mM AOT in the present of various salts, estimated values of AOT<sub>m</sub>, H<sub>2</sub>O<sub>m</sub>, and H<sub>2</sub>O<sub>m</sub>/AOT<sub>m</sub>.

**Table S2.** HPLC average peak areas, observed and normalized (subscript N) product yields for dediazonation reaction of 16-ArN<sub>2</sub><sup>+</sup> in solutions of 15 mM AOT in the present of 1-50 mM **TEABr**, estimated interfacial molarities of headgroup, AOT<sub>m</sub>, water, H<sub>2</sub>O<sub>m</sub>, and their molar ratio, H<sub>2</sub>O<sub>m</sub>/AOT<sub>m</sub>, at 28°C. [HBr] = 1 mM.<sup>a</sup>

| [TEABr]<br>(mM) | Shaker <sup>b</sup> | Peak Areas (10 <sup>6</sup> μv•s) <sup>c</sup> |        | Observed Yields (%) |        |       | Normalized Yields (%) <sup>d</sup> |                     | AOT <sub>m</sub> <sup>e</sup><br>(M) | H <sub>2</sub> O <sub>m</sub> <sup>e</sup><br>(M) | H <sub>2</sub> O <sub>m</sub> /AOT <sub>m</sub> <sup>e</sup> |
|-----------------|---------------------|------------------------------------------------|--------|---------------------|--------|-------|------------------------------------|---------------------|--------------------------------------|---------------------------------------------------|--------------------------------------------------------------|
|                 |                     | 16-ArOH                                        | 16-ArS | 16-ArOH             | 16-ArS | Total | 16-ArOH <sub>N</sub>               | 16-ArS <sub>N</sub> |                                      |                                                   |                                                              |
| 1               | Yes                 | 4.98                                           | 0.71   | 86.4                | 8.9    | 95.3  | 90.6                               | 9.4                 | 1.04                                 | 44.85                                             | 43.2                                                         |
| 1               | No                  | 5.04                                           | 0.71   | 87.4                | 8.9    | 96.3  | 90.8                               | 9.2                 |                                      |                                                   |                                                              |
| 5               | Yes                 | 5.02                                           | 0.78   | 87.0                | 9.7    | 96.7  | 90.0                               | 10.0                | 1.11                                 | 44.10                                             | 39.6                                                         |
| 5               | No                  | 4.95                                           | 0.76   | 85.8                | 9.4    | 95.2  | 90.1                               | 9.9                 |                                      |                                                   |                                                              |
| 10              | Yes                 | 4.68                                           | 0.78   | 81.1                | 9.7    | 90.8  | 89.3                               | 10.7                | 1.20                                 | 43.30                                             | 36.2                                                         |
| 10              | No                  | 4.80                                           | 0.80   | 83.2                | 10.0   | 93.2  | 89.3                               | 10.7                |                                      |                                                   |                                                              |
| 13              | Yes                 | 4.64                                           | 0.80   | 80.6                | 10.0   | 90.6  | 88.9                               | 11.1                | 1.23                                 | 42.93                                             | 34.8                                                         |
| 13              | No                  | 4.78                                           | 0.82   | 82.8                | 10.2   | 93.1  | 89.0                               | 11.0                |                                      |                                                   |                                                              |
| 15              | Yes                 | 4.64                                           | 0.83   | 80.4                | 10.4   | 90.8  | 88.6                               | 11.4                | 1.27                                 | 42.60                                             | 33.6                                                         |
| 15              | No                  | 4.74                                           | 0.84   | 82.2                | 10.4   | 92.6  | 88.7                               | 11.3                |                                      |                                                   |                                                              |
| 20              | Yes                 | 4.55                                           | 0.86   | 78.9                | 10.7   | 89.6  | 88.0                               | 12.0                | 1.32                                 | 42.07                                             | 31.8                                                         |
| 20              | No                  | 4.69                                           | 0.86   | 81.3                | 10.7   | 92.0  | 88.3                               | 11.7                |                                      |                                                   |                                                              |
| 30              | Yes                 | 4.51                                           | 0.96   | 78.3                | 12.0   | 90.3  | 86.7                               | 13.3                | 1.48                                 | 40.50                                             | 27.4                                                         |
| 30              | No                  | 4.53                                           | 0.96   | 78.6                | 12.0   | 90.6  | 86.8                               | 13.2                |                                      |                                                   |                                                              |
| 50              | Yes                 | 4.26                                           | 1.30   | 73.9                | 16.3   | 90.2  | 81.9                               | 18.1                | 2.02                                 | 35.11                                             | 17.3                                                         |
| 50              | No                  | 4.25                                           | 1.33   | 73.8                | 16.6   | 90.3  | 81.7                               | 18.3                |                                      |                                                   |                                                              |

a. Reaction time ca. 48 hours. Prior to HPLC analysis, the product mixture was mixed with an equal volume of water. The final concentrations of 16-ArN<sub>2</sub><sup>+</sup> were ca. 5.8 x 10<sup>-5</sup> M.

b. The reaction tubes were either placed in a thermostated shaker or water bath.

c. 100 μL sample injections. Peak areas are average of triplicate or duplicate injections. Eluting solvents: 65%MeOH/35%*i*-PrOH; Flow rate: 0.4 mL/min; Detector wavelength: 220 nm.

d. % 16-ArS<sub>N</sub> = 100 (%16-ArS)/(%16-ArOH + %16-ArS); % 16-ArOH<sub>N</sub> = 100 (%16-ArOH)/(%16-ArOH + %16-ArS).

e. For each solution composition, the estimated AOT<sub>m</sub> and H<sub>2</sub>O<sub>m</sub> values were average results calculated from both experiments carried out with or without shaker.

**Table S3.** HPLC average peak areas, observed and normalized (subscript N) product yields for dediazotiation reaction of 16-ArN<sub>2</sub><sup>+</sup> in solutions of 15 mM AOT in the present of 1-50 mM **TPABr**, estimated interfacial molarities of headgroup, AOT<sub>m</sub>, water, H<sub>2</sub>O<sub>m</sub>, and their molar ratio, H<sub>2</sub>O<sub>m</sub>/AOT<sub>m</sub>, at 28°C. [HBr] = 1 mM.<sup>a</sup>

| [TPABr]<br>(mM) | Shaker <sup>b</sup> | Peak Areas (10 <sup>6</sup> μv•s) <sup>c</sup> |        | Observed Yields (%) |        |       | Normalized Yields (%) <sup>d</sup> |                     | AOT <sub>m</sub> <sup>e</sup><br>(M) | H <sub>2</sub> O <sub>m</sub> <sup>e</sup><br>(M) | H <sub>2</sub> O <sub>m</sub> /AOT <sub>m</sub> <sup>e</sup> |
|-----------------|---------------------|------------------------------------------------|--------|---------------------|--------|-------|------------------------------------|---------------------|--------------------------------------|---------------------------------------------------|--------------------------------------------------------------|
|                 |                     | 16-ArOH                                        | 16-ArS | 16-ArOH             | 16-ArS | Total | 16-ArOH <sub>N</sub>               | 16-ArS <sub>N</sub> |                                      |                                                   |                                                              |
| 1               | Yes                 | 4.84                                           | 0.70   | 83.9                | 8.7    | 92.6  | 90.6                               | 9.4                 | 1.06                                 | 44.62                                             | 42.0                                                         |
| 1               | No                  | 4.92                                           | 0.73   | 85.3                | 9.1    | 94.4  | 90.4                               | 9.6                 |                                      |                                                   |                                                              |
| 3               | Yes                 | 4.84                                           | 0.74   | 83.9                | 9.2    | 93.1  | 90.1                               | 9.9                 | 1.11                                 | 44.15                                             | 39.8                                                         |
| 3               | No                  | 4.90                                           | 0.75   | 85.0                | 9.4    | 94.3  | 90.1                               | 9.9                 |                                      |                                                   |                                                              |
| 5               | Yes                 | 4.68                                           | 0.77   | 81.1                | 9.6    | 90.7  | 89.4                               | 10.6                | 1.19                                 | 43.34                                             | 36.4                                                         |
| 5               | No                  | 4.77                                           | 0.80   | 82.7                | 10.0   | 92.7  | 89.2                               | 10.8                |                                      |                                                   |                                                              |
| 10              | Yes                 | 4.54                                           | 1.03   | 78.8                | 12.9   | 91.7  | 85.9                               | 14.1                | 1.56                                 | 39.68                                             | 25.4                                                         |
| 10              | No                  | 4.60                                           | 1.04   | 79.8                | 12.9   | 92.7  | 86.1                               | 13.9                |                                      |                                                   |                                                              |
| 15              | Yes                 | 4.41                                           | 1.25   | 76.6                | 15.7   | 92.2  | 83.0                               | 17.0                | 1.88                                 | 36.51                                             | 19.4                                                         |
| 15              | No                  | 4.43                                           | 1.25   | 76.8                | 15.6   | 92.3  | 83.2                               | 16.8                |                                      |                                                   |                                                              |
| 20              | Yes                 | 4.38                                           | 1.25   | 76.0                | 15.6   | 91.5  | 83.0                               | 17.0                | 1.88                                 | 36.51                                             | 19.4                                                         |
| 20              | No                  | 4.37                                           | 1.23   | 75.8                | 15.3   | 91.1  | 83.2                               | 16.8                |                                      |                                                   |                                                              |
| 30              | Yes                 | 4.40                                           | 1.24   | 76.4                | 15.5   | 91.9  | 83.1                               | 16.9                | 1.87                                 | 36.62                                             | 19.6                                                         |
| 30              | No                  | 4.40                                           | 1.23   | 76.4                | 15.4   | 91.7  | 83.2                               | 16.8                |                                      |                                                   |                                                              |
| 50              | Yes                 | 4.38                                           | 1.21   | 76.0                | 15.2   | 91.1  | 83.4                               | 16.6                | 1.84                                 | 36.90                                             | 20.0                                                         |
| 50              | No                  | 4.35                                           | 1.19   | 75.4                | 14.9   | 90.3  | 83.5                               | 16.5                |                                      |                                                   |                                                              |

a. Reaction time ca. 48 hours. Prior to HPLC analysis, the product mixture was mixed with an equal volume of water. The final concentrations of 16-ArN<sub>2</sub><sup>+</sup> were ca. 5.8 x 10<sup>-5</sup> M.

b. The reaction tubes were either placed in a thermostated shaker or water bath.

c. 100 μL sample injections. Peak areas are average of triplicate or duplicate injections. Eluting solvents: 65%MeOH/35%*i*-PrOH; Flow rate: 0.4 mL/min; Detector wavelength: 220 nm.

d. % 16-ArS<sub>N</sub> = 100 (%16-ArS)/(%16-ArOH + %16-ArS); % 16-ArOH<sub>N</sub> = 100 (%16-ArOH)/(%16-ArOH + %16-ArS).

e. For each solution composition, the estimated AOT<sub>m</sub> and H<sub>2</sub>O<sub>m</sub> values were average results calculated from both experiments carried out with or without shaker.

**Table S4.** HPLC average peak areas, observed and normalized (subscript N) product yields for dediazonation reaction of 16-ArN<sub>2</sub><sup>+</sup> in solutions of 15 mM AOT in the present of 1-30 mM **TBABr**, estimated interfacial molarities of headgroup, AOT<sub>m</sub>, water, H<sub>2</sub>O<sub>m</sub>, and their molar ratio, H<sub>2</sub>O<sub>m</sub>/AOT<sub>m</sub>, at 28°C. [HBr] = 1 mM.<sup>a</sup>

| [TBABr]<br>(mM) | Shaker <sup>b</sup> | Peak Areas (10 <sup>6</sup> μv•s) <sup>c</sup> |        | Observed Yields (%) |        |       | Normalized Yields (%) <sup>d</sup> |                     | AOT <sub>m</sub> <sup>e</sup><br>(M) | H <sub>2</sub> O <sub>m</sub> <sup>e</sup><br>(M) | H <sub>2</sub> O <sub>m</sub> /AOT <sub>m</sub> <sup>e</sup> |
|-----------------|---------------------|------------------------------------------------|--------|---------------------|--------|-------|------------------------------------|---------------------|--------------------------------------|---------------------------------------------------|--------------------------------------------------------------|
|                 |                     | 16-ArOH                                        | 16-ArS | 16-ArOH             | 16-ArS | Total | 16-ArOH <sub>N</sub>               | 16-ArS <sub>N</sub> |                                      |                                                   |                                                              |
| 1               | Yes                 | 5.16                                           | 0.75   | 82.3                | 8.7    | 91.0  | 90.5                               | 9.5                 | 1.06                                 | 44.61                                             | 42.0                                                         |
| 1               | No                  | 5.28                                           | 0.77   | 84.2                | 8.8    | 93.0  | 90.5                               | 9.5                 |                                      |                                                   |                                                              |
| 3               | Yes                 | 5.12                                           | 0.91   | 81.8                | 10.5   | 92.3  | 88.6                               | 11.4                | 1.26                                 | 42.70                                             | 34.0                                                         |
| 3               | No                  | 5.13                                           | 0.89   | 81.9                | 10.2   | 92.1  | 88.9                               | 11.1                |                                      |                                                   |                                                              |
| 5               | Yes                 | 4.90                                           | 1.13   | 78.2                | 13.0   | 91.2  | 85.7                               | 14.3                | 1.58                                 | 39.55                                             | 25.1                                                         |
| 5               | No                  | 5.04                                           | 1.14   | 80.4                | 13.1   | 93.4  | 86.0                               | 14.0                |                                      |                                                   |                                                              |
| 10              | Yes                 | 4.96                                           | 1.26   | 79.2                | 14.5   | 93.7  | 84.5                               | 15.5                | 1.69                                 | 38.37                                             | 22.6                                                         |
| 10              | No                  | 5.04                                           | 1.23   | 80.4                | 14.1   | 94.5  | 85.1                               | 14.9                |                                      |                                                   |                                                              |
| 15              | Yes                 | 3.45                                           | 2.50   | 55.3                | 28.8   | 84.1  | 65.7                               | 34.3                | 3.83                                 | 17.25                                             | 4.5                                                          |
| 15              | No                  | 3.52                                           | 2.61   | 56.3                | 30.0   | 86.3  | 65.2                               | 34.8                |                                      |                                                   |                                                              |
| 20              | Yes                 | 3.50                                           | 2.79   | 56.0                | 32.1   | 88.0  | 63.6                               | 36.4                | 4.03                                 | 15.28                                             | 3.8                                                          |
| 20              | No                  | 2.79                                           | 2.21   | 44.7                | 25.4   | 70.1  | 63.8                               | 36.2                |                                      |                                                   |                                                              |
| 30              | Yes                 | 3.35                                           | 2.67   | 53.6                | 30.7   | 84.3  | 63.6                               | 36.4                | 4.07                                 | 14.89                                             | 3.7                                                          |
| 30              | No                  | 2.01                                           | 1.65   | 32.4                | 18.9   | 51.3  | 63.1                               | 36.9                |                                      |                                                   |                                                              |

a. Reaction time ca. 48 hours. Prior to HPLC analysis, the product mixture was mixed with an equal volume of water. The final concentrations of 16-ArN<sub>2</sub><sup>+</sup> were ca. 6.3 x 10<sup>-5</sup> M.

b. The reaction tubes were either placed in a thermostated shaker or water bath.

c. 100 μL sample injections. Peak areas are average of triplicate or duplicate injections. Eluting solvents: 65%MeOH/35%*i*-PrOH; Flow rate: 0.4 mL/min; Detector wavelength: 220 nm.

d. % 16-ArS<sub>N</sub> = 100 (%16-ArS)/(%16-ArOH + %16-ArS); % 16-ArOH<sub>N</sub> = 100 (%16-ArOH)/(%16-ArOH + %16-ArS).

e. For each solution composition, the estimated AOT<sub>m</sub> and H<sub>2</sub>O<sub>m</sub> values were average results calculated from both experiments carried out with or without shaker.

**Table S5.** HPLC average peak areas, observed and normalized (subscript N) product yields for dediazonation reaction of 16-ArN<sub>2</sub><sup>+</sup> in solutions of 15 mM AOT in the present of 1-50 mM **TriEABr**, estimated interfacial molarities of headgroup, AOT<sub>m</sub>, water, H<sub>2</sub>O<sub>m</sub>, and their molar ratio, H<sub>2</sub>O<sub>m</sub>/AOT<sub>m</sub>, at 28°C. [HBr] = 1 mM.<sup>a</sup>

| [TriEABr]<br>(mM) | Shaker <sup>b</sup> | Peak Areas (10 <sup>6</sup> μv•s) <sup>c</sup> |        | Observed Yields (%) |        |       | Normalized Yields (%) <sup>d</sup> |                     | AOT <sub>m</sub> <sup>e</sup><br>(M) | H <sub>2</sub> O <sub>m</sub> <sup>e</sup><br>(M) | H <sub>2</sub> O <sub>m</sub> /AOT <sub>m</sub> <sup>e</sup> |
|-------------------|---------------------|------------------------------------------------|--------|---------------------|--------|-------|------------------------------------|---------------------|--------------------------------------|---------------------------------------------------|--------------------------------------------------------------|
|                   |                     | 16-ArOH                                        | 16-ArS | 16-ArOH             | 16-ArS | Total | 16-ArOH <sub>N</sub>               | 16-ArS <sub>N</sub> |                                      |                                                   |                                                              |
| 1                 | Yes                 | 4.88                                           | 0.73   | 83.1                | 8.9    | 92.1  | 90.3                               | 9.7                 | 1.08                                 | 44.49                                             | 41.4                                                         |
| 1                 | No                  | 4.82                                           | 0.71   | 82.1                | 8.7    | 90.8  | 90.5                               | 9.5                 |                                      |                                                   |                                                              |
| 5                 | Yes                 | 4.80                                           | 0.78   | 81.9                | 9.5    | 91.4  | 89.6                               | 10.4                | 1.17                                 | 43.60                                             | 37.4                                                         |
| 5                 | No                  | 4.83                                           | 0.78   | 82.3                | 9.6    | 91.9  | 89.6                               | 10.4                |                                      |                                                   |                                                              |
| 10                | Yes                 | 4.58                                           | 0.86   | 78.1                | 10.5   | 88.6  | 88.1                               | 11.9                | 1.29                                 | 42.34                                             | 32.7                                                         |
| 10                | No                  | 4.76                                           | 0.84   | 81.1                | 10.3   | 91.4  | 88.7                               | 11.3                |                                      |                                                   |                                                              |
| 13                | Yes                 | 4.40                                           | 0.93   | 75.1                | 11.4   | 86.4  | 86.8                               | 13.2                | 1.43                                 | 41.03                                             | 28.8                                                         |
| 13                | No                  | 4.56                                           | 0.90   | 77.7                | 11.0   | 88.7  | 87.6                               | 12.4                |                                      |                                                   |                                                              |
| 15                | Yes                 | 4.28                                           | 1.11   | 73.0                | 13.7   | 86.6  | 84.2                               | 15.8                | 1.72                                 | 38.15                                             | 22.2                                                         |
| 15                | No                  | 4.44                                           | 1.09   | 75.7                | 13.4   | 89.0  | 85.0                               | 15.0                |                                      |                                                   |                                                              |
| 20                | Yes                 | 4.24                                           | 1.29   | 72.4                | 15.8   | 88.2  | 82.1                               | 17.9                | 1.99                                 | 35.43                                             | 17.8                                                         |
| 20                | No                  | 4.25                                           | 1.29   | 72.5                | 15.8   | 88.3  | 82.1                               | 17.9                |                                      |                                                   |                                                              |
| 30                | Yes                 | 4.24                                           | 1.32   | 72.4                | 16.2   | 88.6  | 81.7                               | 18.3                | 2.03                                 | 35.08                                             | 17.3                                                         |
| 30                | No                  | 4.26                                           | 1.31   | 72.6                | 16.1   | 88.7  | 81.9                               | 18.1                |                                      |                                                   |                                                              |
| 50                | Yes                 | 4.13                                           | 1.30   | 70.5                | 16.0   | 86.5  | 81.5                               | 18.5                | 2.06                                 | 34.75                                             | 16.9                                                         |
| 50                | No                  | 4.21                                           | 1.34   | 71.8                | 16.4   | 88.2  | 81.4                               | 18.6                |                                      |                                                   |                                                              |

a. Reaction time ca. 48 hours. Prior to HPLC analysis, the product mixture was mixed with an equal volume of water. The final concentrations of 16-ArN<sub>2</sub><sup>+</sup> were ca. 5.9 x 10<sup>-5</sup> M.

b. The reaction tubes were either placed in a thermostated shaker or water bath.

c. 100 μL sample injections. Peak areas are average of triplicate or duplicate injections. Eluting solvents: 65%MeOH/35%*i*-PrOH; Flow rate: 0.4 mL/min; Detector wavelength: 220 nm.

d. % 16-ArS<sub>N</sub> = 100 (%16-ArS)/(%16-ArOH + %16-ArS); % 16-ArOH<sub>N</sub> = 100 (%16-ArOH)/(%16-ArOH + %16-ArS).

e. For each solution composition, the estimated AOT<sub>m</sub> and H<sub>2</sub>O<sub>m</sub> values were average results calculated from both experiments carried out with or without shaker.

**Table S6.** HPLC average peak areas, observed and normalized (subscript N) product yields for dediazonation reaction of 16-ArN<sub>2</sub><sup>+</sup> in solutions of 15 mM AOT in the present of 5-50 mM NH<sub>4</sub>Br, estimated interfacial molarities of headgroup, AOT<sub>m</sub>, water, H<sub>2</sub>O<sub>m</sub>, and their molar ratio, H<sub>2</sub>O<sub>m</sub>/AOT<sub>m</sub>, at 28°C. [HBr] = 1 mM.<sup>a</sup>

| [NH <sub>4</sub> Br]<br>(mM) | Shaker <sup>b</sup> | Peak Areas <sup>c</sup> (10 <sup>6</sup> μv•s) <sup>c</sup> |        | Observed Yields (%) |        |       | Normalized Yields (%) <sup>d</sup> |                     | AOT <sub>m</sub> <sup>e</sup><br>(M) | H <sub>2</sub> O <sub>m</sub> <sup>e</sup><br>(M) | H <sub>2</sub> O <sub>m</sub> /AOT <sub>m</sub> <sup>e</sup> |
|------------------------------|---------------------|-------------------------------------------------------------|--------|---------------------|--------|-------|------------------------------------|---------------------|--------------------------------------|---------------------------------------------------|--------------------------------------------------------------|
|                              |                     | 16-ArOH                                                     | 16-ArS | 16-ArOH             | 16-ArS | Total | 16-ArOH <sub>N</sub>               | 16-ArS <sub>N</sub> |                                      |                                                   |                                                              |
| 5                            | Yes                 | 4.83                                                        | 0.75   | 81.7                | 9.1    | 90.8  | 89.9                               | 10.1                | 1.11                                 | 44.19                                             | 40.0                                                         |
| 5                            | No                  | 4.99                                                        | 0.75   | 84.3                | 9.1    | 93.3  | 90.3                               | 9.7                 |                                      |                                                   |                                                              |
| 7                            | Yes                 | 4.88                                                        | 0.78   | 82.5                | 9.5    | 92.0  | 89.7                               | 10.3                | 1.13                                 | 43.98                                             | 39.0                                                         |
| 7                            | No                  | 5.06                                                        | 0.77   | 85.5                | 9.4    | 94.9  | 90.1                               | 9.9                 |                                      |                                                   |                                                              |
| 9                            | Yes                 | 4.85                                                        | 0.80   | 82.0                | 9.8    | 91.8  | 89.3                               | 10.7                | 1.17                                 | 43.54                                             | 37.2                                                         |
| 9                            | No                  | 4.95                                                        | 0.79   | 83.7                | 9.6    | 93.3  | 89.7                               | 10.3                |                                      |                                                   |                                                              |
| 13                           | Yes                 | 4.63                                                        | 0.99   | 78.2                | 12.1   | 90.3  | 86.6                               | 13.4                | 1.45                                 | 40.82                                             | 28.2                                                         |
| 13                           | No                  | 4.75                                                        | 0.95   | 80.3                | 11.6   | 91.9  | 87.4                               | 12.6                |                                      |                                                   |                                                              |
| 15                           | Yes                 | 4.46                                                        | 1.10   | 75.4                | 13.4   | 88.9  | 84.9                               | 15.1                | 1.65                                 | 38.77                                             | 23.4                                                         |
| 15                           | No                  | 4.61                                                        | 1.09   | 77.9                | 13.3   | 91.2  | 85.4                               | 14.6                |                                      |                                                   |                                                              |
| 20                           | Yes                 | 4.37                                                        | 1.24   | 74.0                | 15.1   | 89.1  | 83.0                               | 17.0                | 1.87                                 | 36.67                                             | 19.7                                                         |
| 20                           | No                  | 4.41                                                        | 1.22   | 74.5                | 14.8   | 89.3  | 83.4                               | 16.6                |                                      |                                                   |                                                              |
| 30                           | Yes                 | 4.35                                                        | 1.26   | 73.5                | 15.4   | 88.9  | 82.7                               | 17.3                | 1.89                                 | 36.46                                             | 19.3                                                         |
| 30                           | No                  | 4.36                                                        | 1.21   | 73.7                | 14.7   | 88.3  | 83.4                               | 16.6                |                                      |                                                   |                                                              |
| 50                           | Yes                 | 4.37                                                        | 1.25   | 74.0                | 15.3   | 89.2  | 82.9                               | 17.1                | 1.88                                 | 36.52                                             | 19.4                                                         |
| 50                           | No                  | 4.37                                                        | 1.22   | 73.8                | 14.8   | 88.6  | 83.3                               | 16.7                |                                      |                                                   |                                                              |

a. Reaction time ca. 48 hours. Prior to HPLC analysis, the product mixture was mixed with an equal volume of water. The final concentrations of 16-ArN<sub>2</sub><sup>+</sup> were ca. 5.9 x 10<sup>-5</sup> M.

b. The reaction tubes were either placed in a thermostated shaker or water bath.

c. 100 μL sample injections. Peak areas are average of triplicate or duplicate injections. Eluting solvents: 65%MeOH/35%*i*-PrOH; Flow rate: 0.4 mL/min; Detector wavelength: 220 nm.

d. % 16-ArS<sub>N</sub> = 100 (%16-ArS)/(%16-ArOH + %16-ArS); % 16-ArOH<sub>N</sub> = 100 (%16-ArOH)/(%16-ArOH + %16-ArS).

e. For each solution composition, the estimated AOT<sub>m</sub> and H<sub>2</sub>O<sub>m</sub> values were average results calculated from both experiments carried out with or without shaker.



**Table S7.** HPLC average peak areas, observed and normalized (subscript N) product yields for dediazonation reaction of 16-ArN<sub>2</sub><sup>+</sup> in solutions of 15 mM AOT in the present of 5-50 mM LiCl, estimated interfacial molarities of headgroup, AOT<sub>m</sub>, water, H<sub>2</sub>O<sub>m</sub>, and their molar ratio, H<sub>2</sub>O<sub>m</sub>/AOT<sub>m</sub>, at 28°C. [HCl] = 1 mM.<sup>a</sup>

| [LiCl]<br>(mM) | Shaker <sup>b</sup> | Peak Areas (10 <sup>6</sup> μv•s) <sup>c</sup> |        | Observed Yields (%) |        |       | Normalized Yields (%) <sup>d</sup> |                     | AOT <sub>m</sub> <sup>e</sup><br>(M) | H <sub>2</sub> O <sub>m</sub> <sup>e</sup><br>(M) | H <sub>2</sub> O <sub>m</sub> /AOT <sub>m</sub> <sup>e</sup> |
|----------------|---------------------|------------------------------------------------|--------|---------------------|--------|-------|------------------------------------|---------------------|--------------------------------------|---------------------------------------------------|--------------------------------------------------------------|
|                |                     | 16-ArOH                                        | 16-ArS | 16-ArOH             | 16-ArS | Total | 16-ArOH <sub>N</sub>               | 16-ArS <sub>N</sub> |                                      |                                                   |                                                              |
| 5              | Yes                 | 4.68                                           | 0.74   | 84.0                | 9.5    | 93.5  | 89.8                               | 10.2                | 1.14                                 | 43.88                                             | 38.6                                                         |
| 5              | No                  | 4.81                                           | 0.76   | 86.2                | 9.8    | 95.9  | 89.8                               | 10.2                |                                      |                                                   |                                                              |
| 7              | Yes                 | 4.67                                           | 0.74   | 83.8                | 9.6    | 93.4  | 89.7                               | 10.3                | 1.15                                 | 43.71                                             | 37.8                                                         |
| 7              | No                  | 4.82                                           | 0.78   | 86.4                | 10.0   | 96.4  | 89.6                               | 10.4                |                                      |                                                   |                                                              |
| 9              | Yes                 | 4.65                                           | 0.75   | 83.5                | 9.7    | 93.1  | 89.6                               | 10.4                | 1.15                                 | 43.72                                             | 37.9                                                         |
| 9              | No                  | 4.77                                           | 0.76   | 85.5                | 9.8    | 95.3  | 89.8                               | 10.2                |                                      |                                                   |                                                              |
| 13             | Yes                 | 4.67                                           | 0.77   | 83.8                | 9.9    | 93.7  | 89.4                               | 10.6                | 1.17                                 | 43.51                                             | 37.1                                                         |
| 13             | No                  | 4.72                                           | 0.76   | 84.6                | 9.8    | 94.4  | 89.6                               | 10.4                |                                      |                                                   |                                                              |
| 15             | Yes                 | 4.68                                           | 0.79   | 84.0                | 10.2   | 94.2  | 89.2                               | 10.8                | 1.21                                 | 43.12                                             | 35.5                                                         |
| 15             | No                  | 4.71                                           | 0.80   | 84.4                | 10.3   | 94.7  | 89.1                               | 10.9                |                                      |                                                   |                                                              |
| 20             | Yes                 | 4.64                                           | 0.82   | 83.2                | 10.5   | 93.7  | 88.7                               | 11.3                | 1.26                                 | 42.70                                             | 34.0                                                         |
| 20             | No                  | 4.66                                           | 0.82   | 83.6                | 10.6   | 94.2  | 88.8                               | 11.2                |                                      |                                                   |                                                              |
| 30             | Yes                 | 4.59                                           | 0.87   | 82.3                | 11.2   | 93.5  | 88.0                               | 12.0                | 1.32                                 | 42.06                                             | 31.8                                                         |
| 30             | No                  | 4.63                                           | 0.85   | 83.0                | 11.0   | 93.9  | 88.3                               | 11.7                |                                      |                                                   |                                                              |
| 50             | Yes                 | 4.14                                           | 1.22   | 74.2                | 15.8   | 90.0  | 82.5                               | 17.5                | 1.94                                 | 35.95                                             | 18.5                                                         |
| 50             | No                  | 4.22                                           | 1.23   | 75.6                | 15.8   | 91.5  | 82.7                               | 17.3                |                                      |                                                   |                                                              |

a. Reaction time ca. 48 hours. Prior to HPLC analysis, the product mixture was mixed with an equal volume of water. The final concentrations of 16-ArN<sub>2</sub><sup>+</sup> were ca. 5.6 x 10<sup>-5</sup> M.

b. The reaction tubes were either placed in a thermostated shaker or water bath.

c. 100 μL sample injections. Peak areas are average of triplicate or duplicate injections. Eluting solvents: 65%MeOH/35%*i*-PrOH; Flow rate: 0.4 mL/min; Detector wavelength: 220 nm.

d. % 16-ArS<sub>N</sub> = 100 (%16-ArS)/(%16-ArOH + %16-ArS); % 16-ArOH<sub>N</sub> = 100 (%16-ArOH)/(%16-ArOH + %16-ArS).

e. For each solution composition, the estimated AOT<sub>m</sub> and H<sub>2</sub>O<sub>m</sub> values were average results calculated from both experiments carried out with or without shaker.

**Table S8.** HPLC average peak areas, observed and normalized (subscript N) product yields for dediazonation reaction of 16-ArN<sub>2</sub><sup>+</sup> in solutions of 15 mM AOT in the present of 5-50 mM NaCl, estimated interfacial molarities of headgroup, AOT<sub>m</sub>, water, H<sub>2</sub>O<sub>m</sub>, and their molar ratio, H<sub>2</sub>O<sub>m</sub>/AOT<sub>m</sub>, at 28°C. [HCl] = 1 mM.<sup>a</sup>

| [NaCl]<br>(mM) | Shaker <sup>b</sup> | Peak Areas (10 <sup>6</sup> μv•s) <sup>c</sup> |        | Observed Yields (%) |        |       | Normalized Yields (%) <sup>d</sup> |                     | AOT <sub>m</sub> <sup>e</sup><br>(M) | H <sub>2</sub> O <sub>m</sub> <sup>e</sup><br>(M) | H <sub>2</sub> O <sub>m</sub> /AOT <sub>m</sub> <sup>e</sup> |
|----------------|---------------------|------------------------------------------------|--------|---------------------|--------|-------|------------------------------------|---------------------|--------------------------------------|---------------------------------------------------|--------------------------------------------------------------|
|                |                     | 16-ArOH                                        | 16-ArS | 16-ArOH             | 16-ArS | Total | 16-ArOH <sub>N</sub>               | 16-ArS <sub>N</sub> |                                      |                                                   |                                                              |
| 5              | Yes                 | 5.09                                           | 0.74   | 84.0                | 8.8    | 92.7  | 90.6                               | 9.4                 | 1.04                                 | 44.88                                             | 43.3                                                         |
| 5              | No                  | 5.17                                           | 0.72   | 85.2                | 8.5    | 93.7  | 90.9                               | 9.1                 |                                      |                                                   |                                                              |
| 7              | Yes                 | 5.08                                           | 0.78   | 83.7                | 9.3    | 93.0  | 90.0                               | 10.0                | 1.12                                 | 44.07                                             | 39.4                                                         |
| 7              | No                  | 5.21                                           | 0.80   | 85.9                | 9.5    | 95.5  | 90.0                               | 10.0                |                                      |                                                   |                                                              |
| 9              | Yes                 | 5.00                                           | 0.80   | 82.4                | 9.5    | 91.8  | 89.7                               | 10.3                | 1.14                                 | 43.82                                             | 38.3                                                         |
| 9              | No                  | 5.10                                           | 0.80   | 84.0                | 9.5    | 93.5  | 89.8                               | 10.2                |                                      |                                                   |                                                              |
| 15             | Yes                 | 4.72                                           | 1.02   | 77.8                | 12.2   | 89.9  | 86.5                               | 13.5                | 1.49                                 | 40.42                                             | 27.2                                                         |
| 15             | No                  | 4.78                                           | 1.01   | 78.9                | 12.0   | 90.8  | 86.8                               | 13.2                |                                      |                                                   |                                                              |
| 20             | Yes                 | 4.55                                           | 1.23   | 75.0                | 14.6   | 89.6  | 83.7                               | 16.3                | 1.80                                 | 37.35                                             | 20.8                                                         |
| 20             | No                  | 4.72                                           | 1.25   | 77.8                | 14.8   | 92.7  | 84.0                               | 16.0                |                                      |                                                   |                                                              |
| 30             | Yes                 | 4.45                                           | 1.27   | 73.4                | 15.0   | 88.5  | 83.0                               | 17.0                | 1.89                                 | 36.45                                             | 19.3                                                         |
| 30             | No                  | 4.41                                           | 1.25   | 72.7                | 14.8   | 87.5  | 83.1                               | 16.9                |                                      |                                                   |                                                              |
| 50             | Yes                 | 4.55                                           | 1.26   | 75.1                | 15.0   | 90.1  | 83.3                               | 16.7                | 1.84                                 | 36.98                                             | 20.2                                                         |
| 50             | No                  | 4.55                                           | 1.23   | 75.1                | 14.6   | 89.7  | 83.7                               | 16.3                |                                      |                                                   |                                                              |

a. Reaction time ca. 48 hours. Prior to HPLC analysis, the product mixture was mixed with an equal volume of water. The final concentrations of 16-ArN<sub>2</sub><sup>+</sup> were ca. 6.1 x 10<sup>-5</sup> M.

b. The reaction tubes were either placed in a thermostated shaker or water bath.

c. 100 μL sample injections. Peak areas are average of triplicate or duplicate injections. Eluting solvents: 65%MeOH/35%*i*-PrOH; Flow rate: 0.4 mL/min; Detector wavelength: 220 nm.

d. % 16-ArS<sub>N</sub> = 100 (%16-ArS)/(%16-ArOH + %16-ArS); % 16-ArOH<sub>N</sub> = 100 (%16-ArOH)/(%16-ArOH + %16-ArS).

e. For each solution composition, the estimated AOT<sub>m</sub> and H<sub>2</sub>O<sub>m</sub> values were average results calculated from both experiments carried out with or without shaker.

**Table S9.** HPLC average peak areas, observed and normalized (subscript N) product yields for dediazonation reaction of 16-ArN<sub>2</sub><sup>+</sup> in solutions of 15 mM AOT in the present of 5-50 mM KCl, estimated interfacial molarities of headgroup, AOT<sub>m</sub>, water, H<sub>2</sub>O<sub>m</sub>, and their molar ratio, H<sub>2</sub>O<sub>m</sub>/AOT<sub>m</sub>, at 28°C. [HCl] = 1 mM.<sup>a</sup>

| [KCl]<br>(mM) | Shaker <sup>b</sup> | Peak Areas (10 <sup>6</sup> μv•s) <sup>c</sup> |        | Observed Yields (%) |        |       | Normalized Yields (%) <sup>d</sup> |                     | AOT <sub>m</sub> <sup>e</sup><br>(M) | H <sub>2</sub> O <sub>m</sub> <sup>e</sup><br>(M) | H <sub>2</sub> O <sub>m</sub> /AOT <sub>m</sub> <sup>e</sup> |
|---------------|---------------------|------------------------------------------------|--------|---------------------|--------|-------|------------------------------------|---------------------|--------------------------------------|---------------------------------------------------|--------------------------------------------------------------|
|               |                     | 16-ArOH                                        | 16-ArS | 16-ArOH             | 16-ArS | Total | 16-ArOH <sub>N</sub>               | 16-ArS <sub>N</sub> |                                      |                                                   |                                                              |
| 5             | Yes                 | 4.49                                           | 0.71   | 83.0                | 9.4    | 92.4  | 89.8                               | 10.2                | 1.14                                 | 43.90                                             | 38.7                                                         |
| 5             | No                  | 4.57                                           | 0.72   | 84.5                | 9.5    | 94.1  | 89.9                               | 10.1                |                                      |                                                   |                                                              |
| 7             | Yes                 | 4.44                                           | 0.75   | 82.2                | 9.9    | 92.2  | 89.2                               | 10.8                | 1.22                                 | 43.09                                             | 35.4                                                         |
| 7             | No                  | 4.49                                           | 0.77   | 83.0                | 10.3   | 93.2  | 89.0                               | 11.0                |                                      |                                                   |                                                              |
| 9             | Yes                 | 4.28                                           | 0.97   | 79.2                | 12.9   | 92.1  | 86.0                               | 14.0                | 1.57                                 | 39.63                                             | 25.3                                                         |
| 9             | No                  | 4.31                                           | 0.99   | 79.8                | 13.1   | 92.9  | 85.9                               | 14.1                |                                      |                                                   |                                                              |
| 13            | Yes                 | 4.12                                           | 1.11   | 76.2                | 14.8   | 91.0  | 83.7                               | 16.3                | 1.81                                 | 37.27                                             | 20.6                                                         |
| 13            | No                  | 4.16                                           | 1.12   | 76.9                | 14.9   | 91.8  | 83.8                               | 16.2                |                                      |                                                   |                                                              |
| 15            | Yes                 | 4.08                                           | 1.12   | 75.6                | 14.9   | 90.5  | 83.6                               | 16.4                | 1.82                                 | 37.11                                             | 20.4                                                         |
| 15            | No                  | 4.09                                           | 1.11   | 75.7                | 14.7   | 90.4  | 83.7                               | 16.3                |                                      |                                                   |                                                              |
| 20            | Yes                 | 4.13                                           | 1.12   | 76.4                | 14.9   | 91.3  | 83.7                               | 16.3                | 1.82                                 | 37.13                                             | 20.4                                                         |
| 20            | No                  | 4.13                                           | 1.12   | 76.4                | 14.9   | 91.3  | 83.7                               | 16.3                |                                      |                                                   |                                                              |
| 30            | Yes                 | 4.12                                           | 1.11   | 76.3                | 14.8   | 91.2  | 83.7                               | 16.3                | 1.81                                 | 37.23                                             | 20.6                                                         |
| 30            | No                  | 4.16                                           | 1.12   | 77.0                | 14.9   | 91.9  | 83.8                               | 16.2                |                                      |                                                   |                                                              |
| 50            | Yes                 | 3.99                                           | 1.10   | 73.9                | 14.7   | 88.6  | 83.5                               | 16.5                | 1.85                                 | 36.79                                             | 19.8                                                         |
| 50            | No                  | 3.97                                           | 1.11   | 73.4                | 14.8   | 88.2  | 83.2                               | 16.8                |                                      |                                                   |                                                              |

a. Reaction time ca. 48 hours. Prior to HPLC analysis, the product mixture was mixed with an equal volume of water. The final concentrations of 16-ArN<sub>2</sub><sup>+</sup> were ca. 5.4 x 10<sup>-5</sup> M.

b. The reaction tubes were either placed in a thermostated shaker or water bath.

c. 100 μL sample injections. Peak areas are average of triplicate or duplicate injections. Eluting solvents: 65%MeOH/35%*i*-PrOH; Flow rate: 0.4 mL/min; Detector wavelength: 220 nm.

d. % 16-ArS<sub>N</sub> = 100 (%16-ArS)/(%16-ArOH + %16-ArS); % 16-ArOH<sub>N</sub> = 100 (%16-ArOH)/(%16-ArOH + %16-ArS).

e. For each solution composition, the estimated AOT<sub>m</sub> and H<sub>2</sub>O<sub>m</sub> values were average results calculated from both experiments carried out with or without shaker.

**Table S10.** HPLC average peak areas, observed and normalized (subscript N) product yields for dediazonation reaction of 16-ArN<sub>2</sub><sup>+</sup> in solutions of 15 mM AOT in the present of 5-50 mM **RbCl**, estimated interfacial molarities of headgroup, AOT<sub>m</sub>, water, H<sub>2</sub>O<sub>m</sub>, and their molar ratio, H<sub>2</sub>O<sub>m</sub>/AOT<sub>m</sub>, at 28°C. [HCl] = 1 mM.<sup>a</sup>

| [RbCl]<br>(mM) | Shaker <sup>b</sup> | Peak Areas (10 <sup>6</sup> μv•s) <sup>c</sup> |        | Observed Yields (%) |        |       | Normalized Yields (%) <sup>d</sup> |                     | AOT <sub>m</sub> <sup>e</sup><br>(M) | H <sub>2</sub> O <sub>m</sub> <sup>e</sup><br>(M) | H <sub>2</sub> O <sub>m</sub> /AOT <sub>m</sub> <sup>e</sup> |
|----------------|---------------------|------------------------------------------------|--------|---------------------|--------|-------|------------------------------------|---------------------|--------------------------------------|---------------------------------------------------|--------------------------------------------------------------|
|                |                     | 16-ArOH                                        | 16-ArS | 16-ArOH             | 16-ArS | Total | 16-ArOH <sub>N</sub>               | 16-ArS <sub>N</sub> |                                      |                                                   |                                                              |
| 5              | Yes                 | 4.64                                           | 0.76   | 85.9                | 10.1   | 96.0  | 89.5                               | 10.5                | 1.18                                 | 43.44                                             | 36.8                                                         |
| 5              | No                  | 4.57                                           | 0.76   | 84.4                | 10.1   | 94.5  | 89.4                               | 10.6                |                                      |                                                   |                                                              |
| 7              | Yes                 | 4.45                                           | 0.95   | 82.3                | 12.6   | 94.9  | 86.7                               | 13.3                | 1.49                                 | 40.36                                             | 27.0                                                         |
| 7              | No                  | 4.34                                           | 0.94   | 80.2                | 12.5   | 92.7  | 86.5                               | 13.5                |                                      |                                                   |                                                              |
| 9              | Yes                 | 4.23                                           | 1.06   | 78.2                | 14.1   | 92.3  | 84.7                               | 15.3                | 1.71                                 | 38.18                                             | 22.3                                                         |
| 9              | No                  | 4.19                                           | 1.07   | 77.5                | 14.3   | 91.8  | 84.5                               | 15.5                |                                      |                                                   |                                                              |
| 13             | Yes                 | 4.07                                           | 1.13   | 75.3                | 15.1   | 90.4  | 83.3                               | 16.7                | 1.85                                 | 36.81                                             | 19.9                                                         |
| 13             | No                  | 4.17                                           | 1.15   | 77.1                | 15.3   | 92.4  | 83.4                               | 16.6                |                                      |                                                   |                                                              |
| 15             | Yes                 | 4.08                                           | 1.12   | 75.6                | 15.0   | 90.6  | 83.5                               | 16.5                | 1.82                                 | 37.12                                             | 20.4                                                         |
| 15             | No                  | 4.16                                           | 1.12   | 76.9                | 14.9   | 91.8  | 83.8                               | 16.2                |                                      |                                                   |                                                              |
| 20             | Yes                 | 4.12                                           | 1.12   | 76.2                | 15.0   | 91.2  | 83.6                               | 16.4                | 1.82                                 | 37.11                                             | 20.4                                                         |
| 20             | No                  | 4.06                                           | 1.10   | 75.2                | 14.7   | 89.8  | 83.7                               | 16.3                |                                      |                                                   |                                                              |
| 30             | Yes                 | 4.11                                           | 1.13   | 76.0                | 15.0   | 91.0  | 83.5                               | 16.5                | 1.82                                 | 37.11                                             | 20.4                                                         |
| 30             | No                  | 4.07                                           | 1.10   | 75.3                | 14.6   | 89.8  | 83.8                               | 16.2                |                                      |                                                   |                                                              |
| 50             | Yes                 | 4.09                                           | 1.11   | 75.6                | 14.7   | 90.4  | 83.7                               | 16.3                | 1.82                                 | 37.16                                             | 20.4                                                         |
| 50             | No                  | 4.21                                           | 1.14   | 77.8                | 15.2   | 93.0  | 83.7                               | 16.3                |                                      |                                                   |                                                              |

a. Reaction time ca. 48 hours. Prior to HPLC analysis, the product mixture was mixed with an equal volume of water. The final concentrations of 16-ArN<sub>2</sub><sup>+</sup> were ca. 5.4 x 10<sup>-5</sup> M.

b. The reaction tubes were either placed in a thermostated shaker or water bath.

c. 100 μL sample injections. Peak areas are average of triplicate or duplicate injections. Eluting solvents: 65%MeOH/35%*i*-PrOH; Flow rate: 0.4 mL/min; Detector wavelength: 220 nm.

d. % 16-ArS<sub>N</sub> = 100 (%16-ArS)/(%16-ArOH + %16-ArS); % 16-ArOH<sub>N</sub> = 100 (%16-ArOH)/(%16-ArOH + %16-ArS).

e. For each solution composition, the estimated AOT<sub>m</sub> and H<sub>2</sub>O<sub>m</sub> values were average results calculated from both experiments carried out with or without shaker.

**Table S11.** HPLC average peak areas, observed and normalized (subscript N) product yields for dediazonation reaction of 16-ArN<sub>2</sub><sup>+</sup> in solutions of 15 mM AOT in the present of 5-50 mM CsCl, estimated interfacial molarities of headgroup, AOT<sub>m</sub>, water, H<sub>2</sub>O<sub>m</sub>, and their molar ratio, H<sub>2</sub>O<sub>m</sub>/AOT<sub>m</sub>, at 28°C. [HCl] = 1 mM.<sup>a</sup>

| [CsCl]<br>(mM) | Shaker <sup>b</sup> | Peak Areas (10 <sup>6</sup> μv•s) <sup>c</sup> |        | Observed Yields (%) |        |       | Normalized Yields (%) <sup>d</sup> |                     | AOT <sub>m</sub> <sup>e</sup><br>(M) | H <sub>2</sub> O <sub>m</sub> <sup>e</sup><br>(M) | H <sub>2</sub> O <sub>m</sub> /AOT <sub>m</sub> <sup>e</sup> |
|----------------|---------------------|------------------------------------------------|--------|---------------------|--------|-------|------------------------------------|---------------------|--------------------------------------|---------------------------------------------------|--------------------------------------------------------------|
|                |                     | 16-ArOH                                        | 16-ArS | 16-ArOH             | 16-ArS | Total | 16-ArOH <sub>N</sub>               | 16-ArS <sub>N</sub> |                                      |                                                   |                                                              |
| 5              | Yes                 | 4.80                                           | 0.79   | 86.1                | 10.2   | 96.3  | 89.4                               | 10.6                | 1.18                                 | 43.42                                             | 36.7                                                         |
| 5              | No                  | 4.79                                           | 0.79   | 85.8                | 10.2   | 96.0  | 89.4                               | 10.6                |                                      |                                                   |                                                              |
| 7              | Yes                 | 4.53                                           | 0.98   | 81.2                | 12.6   | 93.8  | 86.6                               | 13.4                | 1.48                                 | 40.47                                             | 27.3                                                         |
| 7              | No                  | 4.58                                           | 0.96   | 82.1                | 12.4   | 94.5  | 86.9                               | 13.1                |                                      |                                                   |                                                              |
| 9              | Yes                 | 4.48                                           | 1.12   | 80.4                | 14.5   | 94.9  | 84.7                               | 15.3                | 1.70                                 | 38.32                                             | 22.6                                                         |
| 9              | No                  | 4.48                                           | 1.12   | 80.3                | 14.4   | 94.7  | 84.8                               | 15.2                |                                      |                                                   |                                                              |
| 13             | Yes                 | 4.37                                           | 1.19   | 78.4                | 15.4   | 93.8  | 83.6                               | 16.4                | 1.82                                 | 37.15                                             | 20.4                                                         |
| 13             | No                  | 4.40                                           | 1.19   | 78.9                | 15.3   | 94.2  | 83.7                               | 16.3                |                                      |                                                   |                                                              |
| 15             | Yes                 | 4.28                                           | 1.18   | 76.8                | 15.2   | 92.0  | 83.4                               | 16.6                | 1.83                                 | 37.05                                             | 20.3                                                         |
| 15             | No                  | 4.37                                           | 1.18   | 78.4                | 15.2   | 93.6  | 83.7                               | 16.3                |                                      |                                                   |                                                              |
| 20             | Yes                 | 4.34                                           | 1.18   | 77.9                | 15.2   | 93.1  | 83.6                               | 16.4                | 1.82                                 | 37.14                                             | 20.4                                                         |
| 20             | No                  | 4.42                                           | 1.20   | 79.3                | 15.4   | 94.7  | 83.7                               | 16.3                |                                      |                                                   |                                                              |
| 30             | Yes                 | 4.36                                           | 1.16   | 78.2                | 14.9   | 93.2  | 84.0                               | 16.0                | 1.78                                 | 37.49                                             | 21.0                                                         |
| 30             | No                  | 4.33                                           | 1.15   | 77.7                | 14.8   | 92.5  | 84.0                               | 16.0                |                                      |                                                   |                                                              |
| 50             | Yes                 | 4.35                                           | 1.14   | 78.0                | 14.7   | 92.7  | 84.2                               | 15.8                | 1.77                                 | 37.61                                             | 21.2                                                         |
| 50             | No                  | 4.25                                           | 1.12   | 76.2                | 14.5   | 90.6  | 84.0                               | 16.0                |                                      |                                                   |                                                              |

a. Reaction time ca. 48 hours. Prior to HPLC analysis, the product mixture was mixed with an equal volume of water. The final concentrations of 16-ArN<sub>2</sub><sup>+</sup> were ca. 5.6 x 10<sup>-5</sup> M.

b. The reaction tubes were either placed in a thermostated shaker or water bath.

c. 100 μL sample injections. Peak areas are average of triplicate or duplicate injections. Eluting solvents: 65%MeOH/35%*i*-PrOH; Flow rate: 0.4 mL/min; Detector wavelength: 220 nm.

d. % 16-ArS<sub>N</sub> = 100 (%16-ArS)/(%16-ArOH + %16-ArS); % 16-ArOH<sub>N</sub> = 100 (%16-ArOH)/(%16-ArOH + %16-ArS).

e. For each solution composition, the estimated AOT<sub>m</sub> and H<sub>2</sub>O<sub>m</sub> values were average results calculated from both experiments carried out with or without shaker.

**Table S12.** HPLC average peak areas, observed and normalized (subscript N) product yields for dediazonation reaction of 16-ArN<sub>2</sub><sup>+</sup> in solutions of 15 mM AOT in the present of 0.5-7.5 mM CaCl<sub>2</sub>, estimated interfacial molarities of headgroup, AOT<sub>m</sub>, water, H<sub>2</sub>O<sub>m</sub>, and their molar ratio, H<sub>2</sub>O<sub>m</sub>/AOT<sub>m</sub>, at 28°C. [HCl] = 1 mM.<sup>a</sup>

| [CaCl <sub>2</sub> ]<br>(mM) | Shaker <sup>b</sup> | Peak Areas (10 <sup>6</sup> μv•s) <sup>c</sup> |        | Observed Yields (%) |        |       | Normalized Yields (%) <sup>d</sup> |                     | AOT <sub>m</sub> <sup>e</sup><br>(M) | H <sub>2</sub> O <sub>m</sub> <sup>e</sup><br>(M) | H <sub>2</sub> O <sub>m</sub> /AOT <sub>m</sub> <sup>e</sup> |
|------------------------------|---------------------|------------------------------------------------|--------|---------------------|--------|-------|------------------------------------|---------------------|--------------------------------------|---------------------------------------------------|--------------------------------------------------------------|
|                              |                     | 16-ArOH                                        | 16-ArS | 16-ArOH             | 16-ArS | Total | 16-ArOH <sub>N</sub>               | 16-ArS <sub>N</sub> |                                      |                                                   |                                                              |
| 0.5                          | Yes                 | 4.95                                           | 0.79   | 83.8                | 9.7    | 93.5  | 89.6                               | 10.4                | 1.13                                 | 43.92                                             | 38.8                                                         |
| 0.5                          | No                  | 5.14                                           | 0.79   | 86.9                | 9.6    | 96.5  | 90.1                               | 9.9                 |                                      |                                                   |                                                              |
| 1.5                          | Yes                 | 4.70                                           | 1.10   | 79.7                | 13.5   | 93.1  | 85.5                               | 14.5                | 1.60                                 | 39.32                                             | 24.6                                                         |
| 1.5                          | No                  | 4.82                                           | 1.11   | 81.6                | 13.5   | 95.2  | 85.8                               | 14.2                |                                      |                                                   |                                                              |
| 2.5                          | Yes                 | 4.40                                           | 1.23   | 74.5                | 15.0   | 89.5  | 83.2                               | 16.8                | 1.85                                 | 36.83                                             | 19.9                                                         |
| 2.5                          | No                  | 4.49                                           | 1.23   | 76.1                | 15.0   | 91.1  | 83.5                               | 16.5                |                                      |                                                   |                                                              |
| 3.5                          | Yes                 | 4.52                                           | 1.31   | 76.6                | 15.9   | 92.5  | 82.8                               | 17.2                | 1.91                                 | 36.24                                             | 19.0                                                         |
| 3.5                          | No                  | 4.49                                           | 1.29   | 76.1                | 15.7   | 91.7  | 82.9                               | 17.1                |                                      |                                                   |                                                              |
| 3.0                          | Yes                 | 4.42                                           | 1.29   | 74.9                | 15.7   | 90.6  | 82.7                               | 17.3                | 1.91                                 | 36.20                                             | 18.9                                                         |
| 3.0                          | No                  | 4.50                                           | 1.29   | 76.2                | 15.7   | 91.8  | 82.9                               | 17.1                |                                      |                                                   |                                                              |
| 5.5                          | Yes                 | 4.31                                           | 1.26   | 73.0                | 15.3   | 88.3  | 82.6                               | 17.4                | 1.93                                 | 36.01                                             | 18.6                                                         |
| 5.5                          | No                  | 4.66                                           | 1.36   | 78.9                | 16.6   | 95.5  | 82.6                               | 17.4                |                                      |                                                   |                                                              |
| 6.5                          | Yes                 | 4.48                                           | 1.29   | 75.8                | 15.7   | 91.5  | 82.9                               | 17.1                | 1.90                                 | 36.33                                             | 19.1                                                         |
| 6.5                          | No                  | 4.43                                           | 1.26   | 75.1                | 15.4   | 90.4  | 83.0                               | 17.0                |                                      |                                                   |                                                              |
| 7.5                          | Yes                 | 4.35                                           | 1.23   | 73.7                | 15.0   | 88.7  | 83.0                               | 17.0                | 1.89                                 | 36.40                                             | 19.2                                                         |
| 7.5                          | No                  | 4.24                                           | 1.21   | 71.8                | 14.8   | 86.5  | 82.9                               | 17.1                |                                      |                                                   |                                                              |

a. Reaction time ca. 48 hours. Prior to HPLC analysis, the product mixture was mixed with an equal volume of water. The final concentrations of 16-ArN<sub>2</sub><sup>+</sup> were ca. 5.9 x 10<sup>-5</sup> M.

b. The reaction tubes were either placed in a thermostated shaker or water bath.

c. 100 μL sample injections. Peak areas are average of triplicate or duplicate injections. Eluting solvents: 65%MeOH/35%*i*-PrOH; Flow rate: 0.4 mL/min; Detector wavelength: 220 nm.

d. % 16-ArS<sub>N</sub> = 100 (%16-ArS)/(%16-ArOH + %16-ArS); % 16-ArOH<sub>N</sub> = 100 (%16-ArOH)/(%16-ArOH + %16-ArS).

e. For each solution composition, the estimated AOT<sub>m</sub> and H<sub>2</sub>O<sub>m</sub> values were average results calculated from both experiments carried out with or without shaker.

**Table S13.** HPLC average peak areas, observed and normalized (subscript N) product yields for dediazonation reaction of 16-ArN<sub>2</sub><sup>+</sup> in solutions of 15 mM AOT in the present of 0.5-7.5 mM MgCl<sub>2</sub>, estimated interfacial molarities of headgroup, AOT<sub>m</sub>, water, H<sub>2</sub>O<sub>m</sub>, and their molar ratio, H<sub>2</sub>O<sub>m</sub>/AOT<sub>m</sub>, at 28°C. [HCl] = 1 mM.<sup>a</sup>

| [MgCl <sub>2</sub> ]<br>(mM) | Shaker <sup>b</sup> | Peak Areas (10 <sup>6</sup> μv•s) <sup>c</sup> |        | Observed Yields (%) |        |       | Normalized Yields (%) <sup>d</sup> |                     | AOT <sub>m</sub> <sup>e</sup><br>(M) | H <sub>2</sub> O <sub>m</sub> <sup>e</sup><br>(M) | H <sub>2</sub> O <sub>m</sub> /AOT <sub>m</sub> <sup>e</sup> |
|------------------------------|---------------------|------------------------------------------------|--------|---------------------|--------|-------|------------------------------------|---------------------|--------------------------------------|---------------------------------------------------|--------------------------------------------------------------|
|                              |                     | 16-ArOH                                        | 16-ArS | 16-ArOH             | 16-ArS | Total | 16-ArOH <sub>N</sub>               | 16-ArS <sub>N</sub> |                                      |                                                   |                                                              |
| 0.5                          | Yes                 | 5.49                                           | 0.86   | 79.9                | 9.1    | 89.0  | 89.8                               | 10.2                | 1.12                                 | 44.05                                             | 39.3                                                         |
| 0.5                          | No                  | 5.58                                           | 0.85   | 81.2                | 8.9    | 90.1  | 90.1                               | 9.9                 |                                      |                                                   |                                                              |
| 1.5                          | Yes                 | 5.17                                           | 1.13   | 75.4                | 11.9   | 87.3  | 86.4                               | 13.6                | 1.52                                 | 40.13                                             | 26.5                                                         |
| 1.5                          | No                  | 5.30                                           | 1.16   | 77.2                | 12.1   | 89.4  | 86.4                               | 13.6                |                                      |                                                   |                                                              |
| 2.5                          | Yes                 | 4.97                                           | 1.37   | 72.4                | 14.4   | 86.8  | 83.4                               | 16.6                | 1.83                                 | 37.02                                             | 20.2                                                         |
| 2.5                          | No                  | 5.05                                           | 1.37   | 73.5                | 14.3   | 87.9  | 83.7                               | 16.3                |                                      |                                                   |                                                              |
| 3.5                          | Yes                 | 5.01                                           | 1.50   | 73.0                | 15.7   | 88.7  | 82.3                               | 17.7                | 1.96                                 | 35.70                                             | 18.2                                                         |
| 3.5                          | No                  | 5.00                                           | 1.48   | 72.9                | 15.5   | 88.4  | 82.4                               | 17.6                |                                      |                                                   |                                                              |
| 3.0                          | Yes                 | 4.95                                           | 1.51   | 72.1                | 15.9   | 88.0  | 82.0                               | 18.0                | 2.00                                 | 35.35                                             | 17.7                                                         |
| 3.0                          | No                  | 5.10                                           | 1.55   | 74.3                | 16.2   | 90.6  | 82.1                               | 17.9                |                                      |                                                   |                                                              |
| 5.5                          | Yes                 | 4.93                                           | 1.53   | 71.9                | 16.1   | 88.0  | 81.7                               | 18.3                | 2.02                                 | 35.18                                             | 17.4                                                         |
| 5.5                          | No                  | 5.71                                           | 1.74   | 83.1                | 18.2   | 101   | 82.0                               | 18.0                |                                      |                                                   |                                                              |
| 6.5                          | Yes                 | 4.92                                           | 1.53   | 71.7                | 16.0   | 87.7  | 81.7                               | 18.3                | 2.02                                 | 35.14                                             | 17.4                                                         |
| 6.5                          | No                  | 5.49                                           | 1.68   | 79.9                | 17.6   | 97.5  | 82.0                               | 18.0                |                                      |                                                   |                                                              |
| 7.5                          | Yes                 | 4.94                                           | 1.52   | 72.0                | 15.9   | 87.9  | 81.9                               | 18.1                | 2.01                                 | 35.21                                             | 17.5                                                         |
| 7.5                          | No                  | 5.41                                           | 1.66   | 78.7                | 17.4   | 96.1  | 81.9                               | 18.1                |                                      |                                                   |                                                              |

a. Reaction time ca. 48 hours. Prior to HPLC analysis, the product mixture was mixed with an equal volume of water. The final concentrations of 16-ArN<sub>2</sub><sup>+</sup> were ca. 6.9 x 10<sup>-5</sup> M.

b. The reaction tubes were either placed in a thermostated shaker or water bath.

c. 100 μL sample injections. Peak areas are average of triplicate or duplicate injections. Eluting solvents: 65%MeOH/35%*i*-PrOH; Flow rate: 0.4 mL/min; Detector wavelength: 220 nm.

d. % 16-ArS<sub>N</sub> = 100 (%16-ArS)/(%16-ArOH + %16-ArS); % 16-ArOH<sub>N</sub> = 100 (%16-ArOH)/(%16-ArOH + %16-ArS).

e. For each solution composition, the estimated AOT<sub>m</sub> and H<sub>2</sub>O<sub>m</sub> values were average results calculated from both experiments carried out with or without shaker.

**Table S14.** HPLC average peak areas, observed and normalized (subscript N) product yields for dediazonation reaction of 16-ArN<sub>2</sub><sup>+</sup> in solutions of 15 mM AOT in the presence of 2.5-7.5 mM ZnCl<sub>2</sub>, estimated interfacial molarities of headgroup, AOT<sub>m</sub>, water, H<sub>2</sub>O<sub>m</sub>, and their molar ratio, H<sub>2</sub>O<sub>m</sub>/AOT<sub>m</sub>, at 28°C. [HCl] = 1 mM.<sup>a</sup>

| [ZnCl <sub>2</sub> ]<br>(mM) | Shaker <sup>b</sup> | Peak Areas (10 <sup>6</sup> μv•s) <sup>c</sup> |        | Observed Yields (%) |        |       | Normalized Yields (%) <sup>d</sup> |                     | AOT <sub>m</sub> <sup>e</sup><br>(M) | H <sub>2</sub> O <sub>m</sub> <sup>e</sup><br>(M) | H <sub>2</sub> O <sub>m</sub> /AOT <sub>m</sub> <sup>e</sup> |
|------------------------------|---------------------|------------------------------------------------|--------|---------------------|--------|-------|------------------------------------|---------------------|--------------------------------------|---------------------------------------------------|--------------------------------------------------------------|
|                              |                     | 16-ArOH                                        | 16-ArS | 16-ArOH             | 16-ArS | Total | 16-ArOH <sub>N</sub>               | 16-ArS <sub>N</sub> |                                      |                                                   |                                                              |
| 2.5                          | Yes                 | 4.64                                           | 1.31   | 71.9                | 14.6   | 86.5  | 83.1                               | 16.9                | 1.86                                 | 36.73                                             | 19.7                                                         |
| 2.5                          | No                  | 4.68                                           | 1.29   | 72.4                | 14.3   | 86.7  | 83.5                               | 16.5                |                                      |                                                   |                                                              |
| 3.0                          | Yes                 | 4.56                                           | 1.41   | 70.6                | 15.7   | 86.3  | 81.8                               | 18.2                | 2.01                                 | 35.23                                             | 17.5                                                         |
| 3.0                          | No                  | 4.66                                           | 1.42   | 72.1                | 15.8   | 88.0  | 82.0                               | 18.0                |                                      |                                                   |                                                              |
| 7.5                          | Yes                 | 4.52                                           | 1.41   | 69.9                | 15.7   | 85.6  | 81.6                               | 18.4                | 2.02                                 | 35.12                                             | 17.4                                                         |
| 7.5                          | No                  | 4.53                                           | 1.38   | 70.1                | 15.4   | 85.4  | 82.0                               | 18.0                |                                      |                                                   |                                                              |

a. Reaction time ca. 48 hours. Prior to HPLC analysis, the product mixture was mixed with an equal volume of water. The final concentrations of 16-ArN<sub>2</sub><sup>+</sup> were ca. 6.5 x 10<sup>-5</sup> M.

b. The reaction tubes were either placed in a thermostated shaker or water bath.

c. 100 μL sample injections. Peak areas are average of triplicate or duplicate injections. Eluting solvents: 65%MeOH/35%*i*-PrOH; Flow rate: 0.4 mL/min; Detector wavelength: 220 nm.

d. % 16-ArS<sub>N</sub> = 100 (%16-ArS)/(%16-ArOH + %16-ArS); % 16-ArOH<sub>N</sub> = 100 (%16-ArOH)/(%16-ArOH + %16-ArS).

e. For each solution composition, the estimated AOT<sub>m</sub> and H<sub>2</sub>O<sub>m</sub> values were average results calculated from both experiments carried out with or without shaker.



**Table S15.** HPLC average peak areas, observed and normalized (subscript N) product yields for dediazonation reaction of 16-ArN<sub>2</sub><sup>+</sup> in solutions of 15 mM AOT in the presence of 0.3-3 mM AlCl<sub>3</sub>, estimated interfacial molarities of headgroup, AOT<sub>m</sub>, water, H<sub>2</sub>O<sub>m</sub>, and their molar ratio, H<sub>2</sub>O<sub>m</sub>/AOT<sub>m</sub>, at 28°C. [HCl] = 1 mM.<sup>a</sup>

| [AlCl <sub>3</sub> ]<br>(mM) | Shaker <sup>b</sup> | Peak Areas (10 <sup>6</sup> μv•s) <sup>c</sup> |        | Observed Yields (%) |        |       | Normalized Yields (%) <sup>d</sup> |                     | AOT <sub>m</sub> <sup>e</sup><br>(M) | H <sub>2</sub> O <sub>m</sub> <sup>e</sup><br>(M) | H <sub>2</sub> O <sub>m</sub> /AOT <sub>m</sub> <sup>e</sup> |
|------------------------------|---------------------|------------------------------------------------|--------|---------------------|--------|-------|------------------------------------|---------------------|--------------------------------------|---------------------------------------------------|--------------------------------------------------------------|
|                              |                     | 16-ArOH                                        | 16-ArS | 16-ArOH             | 16-ArS | Total | 16-ArOH <sub>N</sub>               | 16-ArS <sub>N</sub> |                                      |                                                   |                                                              |
| 0.3                          | Yes                 | 4.87                                           | 0.85   | 82.5                | 10.4   | 92.9  | 88.8                               | 11.2                | 1.25                                 | 42.78                                             | 34.3                                                         |
| 0.3                          | No                  | 5.03                                           | 0.88   | 85.1                | 10.7   | 95.8  | 88.9                               | 11.1                |                                      |                                                   |                                                              |
| 1.0                          | Yes                 | 5.54                                           | 1.13   | 85.7                | 12.6   | 98.3  | 87.2                               | 12.8                | 1.39                                 | 41.41                                             | 29.9                                                         |
| 1.0                          | No                  | 5.96                                           | 1.14   | 92.1                | 12.7   | 104.8 | 87.9                               | 12.1                |                                      |                                                   |                                                              |
| 1.7                          | Yes                 | 4.71                                           | 1.24   | 79.7                | 15.1   | 94.8  | 84.1                               | 15.9                | 1.69                                 | 38.45                                             | 22.8                                                         |
| 1.7                          | No                  | 5.37                                           | 1.25   | 90.9                | 15.2   | 106.1 | 85.7                               | 14.3                |                                      |                                                   |                                                              |
| 2.3                          | Yes                 | 4.41                                           | 1.31   | 74.8                | 15.9   | 90.7  | 82.4                               | 17.6                | 1.95                                 | 35.89                                             | 18.4                                                         |
| 2.3                          | No                  | 4.38                                           | 1.28   | 74.2                | 15.6   | 89.8  | 82.6                               | 17.4                |                                      |                                                   |                                                              |
| 3.0                          | Yes                 | 4.04                                           | 1.29   | 68.6                | 15.7   | 84.3  | 81.3                               | 18.7                | 2.02                                 | 35.16                                             | 17.4                                                         |
| 3.0                          | No                  | 4.36                                           | 1.30   | 73.9                | 15.8   | 89.7  | 82.4                               | 17.6                |                                      |                                                   |                                                              |

a. Reaction time ca. 48 hours. Prior to HPLC analysis, the product mixture was mixed with an equal volume of water. The final concentrations of 16-ArN<sub>2</sub><sup>+</sup> were ca. 5.9 x 10<sup>-5</sup> M.

b. The reaction tubes were either placed in a thermostated shaker or water bath.

c. 100 μL sample injections. Peak areas are average of triplicate or duplicate injections. Eluting solvents: 65%MeOH/35%*i*-PrOH; Flow rate: 0.4 mL/min; Detector wavelength: 220 nm.

d. % 16-ArS<sub>N</sub> = 100 (%16-ArS)/(%16-ArOH + %16-ArS); % 16-ArOH<sub>N</sub> = 100 (%16-ArOH)/(%16-ArOH + %16-ArS).

e. For each solution composition, the estimated AOT<sub>m</sub> and H<sub>2</sub>O<sub>m</sub> values were average results calculated from both experiments carried out with or without shaker.

**Table S16.** HPLC average peak areas, observed and normalized (subscript N) product yields for dediazonation reaction of 16-ArN<sub>2</sub><sup>+</sup> in solutions of 15 mM AOT in the present of 5-50 mM **NaBr**, estimated interfacial molarities of headgroup, AOT<sub>m</sub>, water, H<sub>2</sub>O<sub>m</sub>, and their molar ratio, H<sub>2</sub>O<sub>m</sub>/AOT<sub>m</sub>, at 28°C. [HBr] = 1 mM.<sup>a</sup>

| [NaBr]<br>(mM) | Shaker <sup>b</sup> | Peak Areas (10 <sup>6</sup> μv•s) <sup>c</sup> |        | Observed Yields (%) |        |       | Normalized Yields (%) <sup>d</sup> |                     | AOT <sub>m</sub> <sup>e</sup><br>(M) | H <sub>2</sub> O <sub>m</sub> <sup>e</sup><br>(M) | H <sub>2</sub> O <sub>m</sub> /AOT <sub>m</sub> <sup>e</sup> |
|----------------|---------------------|------------------------------------------------|--------|---------------------|--------|-------|------------------------------------|---------------------|--------------------------------------|---------------------------------------------------|--------------------------------------------------------------|
|                |                     | 16-ArOH                                        | 16-ArS | 16-ArOH             | 16-ArS | Total | 16-ArOH <sub>N</sub>               | 16-ArS <sub>N</sub> |                                      |                                                   |                                                              |
| 5              | Yes                 | 5.04                                           | 0.76   | 86.0                | 9.4    | 95.3  | 90.2                               | 9.8                 | 1.10                                 | 44.21                                             | 40.0                                                         |
| 5              | No                  | 5.04                                           | 0.77   | 85.9                | 9.5    | 95.4  | 90.1                               | 9.9                 |                                      |                                                   |                                                              |
| 7              | Yes                 | 5.00                                           | 0.78   | 85.3                | 9.6    | 94.9  | 89.9                               | 10.1                | 1.12                                 | 44.08                                             | 39.5                                                         |
| 7              | No                  | 5.03                                           | 0.77   | 85.7                | 9.4    | 95.0  | 90.1                               | 9.9                 |                                      |                                                   |                                                              |
| 9              | Yes                 | 4.94                                           | 0.78   | 84.3                | 9.6    | 93.9  | 89.8                               | 10.2                | 1.14                                 | 43.82                                             | 38.3                                                         |
| 9              | No                  | 5.01                                           | 0.79   | 85.4                | 9.7    | 95.1  | 89.8                               | 10.2                |                                      |                                                   |                                                              |
| 13             | Yes                 | 4.79                                           | 0.83   | 81.7                | 10.2   | 91.9  | 88.9                               | 11.1                | 1.24                                 | 42.83                                             | 34.4                                                         |
| 13             | No                  | 4.90                                           | 0.86   | 83.5                | 10.5   | 94.0  | 88.8                               | 11.2                |                                      |                                                   |                                                              |
| 15             | Yes                 | 4.65                                           | 0.93   | 79.2                | 11.4   | 90.6  | 87.4                               | 12.6                | 1.41                                 | 41.22                                             | 29.3                                                         |
| 15             | No                  | 4.73                                           | 0.95   | 80.6                | 11.7   | 92.2  | 87.4                               | 12.6                |                                      |                                                   |                                                              |
| 20             | Yes                 | 4.47                                           | 1.17   | 76.2                | 14.4   | 90.6  | 84.1                               | 15.9                | 1.75                                 | 37.82                                             | 21.6                                                         |
| 20             | No                  | 4.53                                           | 1.16   | 77.3                | 14.2   | 91.5  | 84.4                               | 15.6                |                                      |                                                   |                                                              |
| 30             | Yes                 | 4.29                                           | 1.22   | 73.2                | 15.0   | 88.2  | 83.0                               | 17.0                | 1.90                                 | 36.30                                             | 19.1                                                         |
| 30             | No                  | 4.32                                           | 1.25   | 73.7                | 15.3   | 89.0  | 82.8                               | 17.2                |                                      |                                                   |                                                              |
| 50             | Yes                 | 4.42                                           | 1.20   | 75.5                | 14.7   | 90.2  | 83.7                               | 16.3                | 1.84                                 | 36.95                                             | 20.1                                                         |
| 50             | No                  | 4.47                                           | 1.25   | 76.2                | 15.3   | 91.5  | 83.3                               | 16.7                |                                      |                                                   |                                                              |

a. Reaction time ca. 48 hours. Prior to HPLC analysis, the product mixture was mixed with an equal volume of water. The final concentrations of 16-ArN<sub>2</sub><sup>+</sup> were ca. 5.9 x 10<sup>-5</sup> M.

b. The reaction tubes were either placed in a thermostated shaker or water bath.

c. 100 μL sample injections. Peak areas are average of triplicate or duplicate injections. Eluting solvents: 65%MeOH/35%*i*-PrOH; Flow rate: 0.4 mL/min; Detector wavelength: 220 nm.

d. % 16-ArS<sub>N</sub> = 100 (%16-ArS)/(%16-ArOH + %16-ArS); % 16-ArOH<sub>N</sub> = 100 (%16-ArOH)/(%16-ArOH + %16-ArS).

e. For each solution composition, the estimated AOT<sub>m</sub> and H<sub>2</sub>O<sub>m</sub> values were average results calculated from both experiments carried out with or without shaker.

**Table S17.** HPLC average peak areas, observed and normalized (subscript N) product yields for dediazonation reaction of 16-ArN<sub>2</sub><sup>+</sup> in solutions of 15 mM AOT in the present of 5-50 mM NaSCN, estimated interfacial molarities of headgroup, AOT<sub>m</sub>, water, H<sub>2</sub>O<sub>m</sub>, and their molar ratio, H<sub>2</sub>O<sub>m</sub>/AOT<sub>m</sub>, at 28°C. [HBr] = 1 mM.<sup>a</sup>

| [NaSCN]<br>(mM) | Shaker <sup>b</sup> | Peak Areas (10 <sup>6</sup> μv•s) <sup>c</sup> |        | Observed Yields (%) |        |       | Normalized Yields (%) <sup>d</sup> |                     | AOT <sub>m</sub> <sup>e</sup><br>(M) | H <sub>2</sub> O <sub>m</sub> <sup>e</sup><br>(M) | H <sub>2</sub> O <sub>m</sub> /AOT <sub>m</sub> <sup>e</sup> |
|-----------------|---------------------|------------------------------------------------|--------|---------------------|--------|-------|------------------------------------|---------------------|--------------------------------------|---------------------------------------------------|--------------------------------------------------------------|
|                 |                     | 16-ArOH                                        | 16-ArS | 16-ArOH             | 16-ArS | Total | 16-ArOH <sub>N</sub>               | 16-ArS <sub>N</sub> |                                      |                                                   |                                                              |
| 5               | Yes                 | 5.35                                           | 0.82   | 85.6                | 9.5    | 95.1  | 90.1                               | 9.9                 | 1.10                                 | 44.28                                             | 40.4                                                         |
| 5               | No                  | 5.44                                           | 0.81   | 87.0                | 9.3    | 96.3  | 90.3                               | 9.7                 |                                      |                                                   |                                                              |
| 7               | Yes                 | 5.30                                           | 0.82   | 84.8                | 9.5    | 94.3  | 89.9                               | 10.1                | 1.11                                 | 44.11                                             | 39.6                                                         |
| 7               | No                  | 5.40                                           | 0.82   | 86.5                | 9.5    | 96.0  | 90.1                               | 9.9                 |                                      |                                                   |                                                              |
| 9               | Yes                 | 5.26                                           | 0.83   | 84.3                | 9.6    | 93.8  | 89.8                               | 10.2                | 1.14                                 | 43.87                                             | 38.5                                                         |
| 9               | No                  | 5.31                                           | 0.83   | 85.1                | 9.6    | 94.7  | 89.8                               | 10.2                |                                      |                                                   |                                                              |
| 13              | Yes                 | 5.05                                           | 0.93   | 80.8                | 10.7   | 91.5  | 88.3                               | 11.7                | 1.30                                 | 42.27                                             | 32.5                                                         |
| 13              | No                  | 5.19                                           | 0.95   | 83.2                | 10.9   | 94.1  | 88.4                               | 11.6                |                                      |                                                   |                                                              |
| 15              | Yes                 | 4.96                                           | 1.10   | 79.4                | 12.7   | 92.1  | 86.3                               | 13.7                | 1.52                                 | 40.12                                             | 26.4                                                         |
| 15              | No                  | 5.10                                           | 1.10   | 81.7                | 12.7   | 94.4  | 86.5                               | 13.5                |                                      |                                                   |                                                              |
| 20              | Yes                 | 4.74                                           | 1.29   | 75.9                | 14.8   | 90.7  | 83.6                               | 16.4                | 1.82                                 | 37.17                                             | 20.5                                                         |
| 20              | No                  | 4.81                                           | 1.30   | 77.1                | 15.0   | 92.1  | 83.7                               | 16.3                |                                      |                                                   |                                                              |
| 30              | Yes                 | 4.63                                           | 1.32   | 74.2                | 15.2   | 89.5  | 83.0                               | 17.0                | 1.88                                 | 36.53                                             | 19.4                                                         |
| 30              | No                  | 4.76                                           | 1.33   | 76.2                | 15.3   | 91.5  | 83.2                               | 16.8                |                                      |                                                   |                                                              |
| 50              | Yes                 | 4.75                                           | 1.32   | 76.0                | 15.2   | 91.2  | 83.3                               | 16.7                | 1.86                                 | 36.78                                             | 19.8                                                         |
| 50              | No                  | 4.75                                           | 1.32   | 76.1                | 15.2   | 91.3  | 83.3                               | 16.7                |                                      |                                                   |                                                              |

a. Reaction time ca. 48 hours. Prior to HPLC analysis, the product mixture was mixed with an equal volume of water. The final concentrations of 16-ArN<sub>2</sub><sup>+</sup> were ca. 6.3 x 10<sup>-5</sup> M.

b. The reaction tubes were either placed in a thermostated shaker or water bath.

c. 100 μL sample injections. Peak areas are average of triplicate or duplicate injections. Eluting solvents: 65%MeOH/35%*i*-PrOH; Flow rate: 0.4 mL/min; Detector wavelength: 220 nm.

d. % 16-ArS<sub>N</sub> = 100 (%16-ArS)/(%16-ArOH + %16-ArS); % 16-ArOH<sub>N</sub> = 100 (%16-ArOH)/(%16-ArOH + %16-ArS).

e. For each solution composition, the estimated AOT<sub>m</sub> and H<sub>2</sub>O<sub>m</sub> values were average results calculated from both experiments carried out with or without shaker.

**Table S18.** HPLC average peak areas, observed and normalized (subscript N) product yields for dediazonation reaction of 16-ArN<sub>2</sub><sup>+</sup> in solutions of 15 mM AOT in the present of 5-50 mM sodium benzoate **NaBenz**, estimated interfacial molarities of headgroup, AOT<sub>m</sub>, water, H<sub>2</sub>O<sub>m</sub>, and their molar ratio, H<sub>2</sub>O<sub>m</sub>/AOT<sub>m</sub>, at 28°C. [HBr] = 1 mM.<sup>a</sup>

| [NaBenz]<br>(mM) | Shaker <sup>b</sup> | Peak Areas (10 <sup>6</sup> μv•s) <sup>c</sup> |        | Observed Yields (%) |        |       | Normalized Yields (%) <sup>d</sup> |                     | AOT <sub>m</sub> <sup>e</sup><br>(M) | H <sub>2</sub> O <sub>m</sub> <sup>e</sup><br>(M) | H <sub>2</sub> O <sub>m</sub> /AOT <sub>m</sub> <sup>e</sup> |
|------------------|---------------------|------------------------------------------------|--------|---------------------|--------|-------|------------------------------------|---------------------|--------------------------------------|---------------------------------------------------|--------------------------------------------------------------|
|                  |                     | 16-ArOH                                        | 16-ArS | 16-ArOH             | 16-ArS | Total | 16-ArOH <sub>N</sub>               | 16-ArS <sub>N</sub> |                                      |                                                   |                                                              |
| 5                | Yes                 | 5.06                                           | 0.76   | 82.3                | 9.0    | 91.3  | 90.2                               | 9.8                 | 1.09                                 | 44.32                                             | 40.6                                                         |
| 5                | No                  | 5.25                                           | 0.79   | 85.3                | 9.2    | 94.5  | 90.3                               | 9.7                 |                                      |                                                   |                                                              |
| 7                | Yes                 | 4.99                                           | 0.77   | 81.2                | 9.0    | 90.2  | 90.0                               | 10.0                | 1.12                                 | 44.09                                             | 39.5                                                         |
| 7                | No                  | 5.19                                           | 0.80   | 84.4                | 9.3    | 93.7  | 90.0                               | 10.0                |                                      |                                                   |                                                              |
| 9                | Yes                 | 4.94                                           | 0.78   | 80.5                | 9.1    | 89.6  | 89.8                               | 10.2                | 1.13                                 | 43.94                                             | 38.8                                                         |
| 9                | No                  | 5.15                                           | 0.80   | 83.7                | 9.4    | 93.1  | 89.9                               | 10.1                |                                      |                                                   |                                                              |
| 13               | Yes                 | 4.90                                           | 0.82   | 79.8                | 9.6    | 89.3  | 89.3                               | 10.7                | 1.18                                 | 43.45                                             | 36.8                                                         |
| 13               | No                  | 5.12                                           | 0.83   | 83.2                | 9.7    | 92.9  | 89.6                               | 10.4                |                                      |                                                   |                                                              |
| 15               | Yes                 | 4.71                                           | 0.92   | 76.6                | 10.7   | 87.4  | 87.7                               | 12.3                | 1.38                                 | 41.48                                             | 30.1                                                         |
| 15               | No                  | 4.90                                           | 0.97   | 79.7                | 11.3   | 91.0  | 87.6                               | 12.4                |                                      |                                                   |                                                              |
| 20               | Yes                 | 4.47                                           | 1.14   | 72.8                | 13.3   | 86.2  | 84.5                               | 15.5                | 1.73                                 | 38.00                                             | 21.9                                                         |
| 20               | No                  | 4.59                                           | 1.18   | 74.7                | 13.8   | 88.5  | 84.4                               | 15.6                |                                      |                                                   |                                                              |
| 30               | Yes                 | 4.46                                           | 1.26   | 72.6                | 14.7   | 87.4  | 83.1                               | 16.9                | 1.87                                 | 36.60                                             | 19.5                                                         |
| 30               | No                  | 4.52                                           | 1.27   | 73.5                | 14.8   | 88.4  | 83.2                               | 16.8                |                                      |                                                   |                                                              |
| 50               | Yes                 | 4.52                                           | 1.22   | 73.7                | 14.3   | 88.0  | 83.7                               | 16.3                | 1.82                                 | 37.16                                             | 20.5                                                         |
| 50               | No                  | 4.58                                           | 1.24   | 74.5                | 14.5   | 89.0  | 83.7                               | 16.3                |                                      |                                                   |                                                              |

a. Reaction time ca. 48 hours. Prior to HPLC analysis, the product mixture was mixed with an equal volume of water. The final concentrations of 16-ArN<sub>2</sub><sup>+</sup> were ca. 6.2 x 10<sup>-5</sup> M.

b. The reaction tubes were either placed in a thermostated shaker or water bath.

c. 100 μL sample injections. Peak areas are average of triplicate or duplicate injections. Eluting solvents: 65%MeOH/35%*i*-PrOH; Flow rate: 0.4 mL/min; Detector wavelength: 220 nm.

d. % 16-ArS<sub>N</sub> = 100 (%16-ArS)/(%16-ArOH + %16-ArS); % 16-ArOH<sub>N</sub> = 100 (%16-ArOH)/(%16-ArOH + %16-ArS).

e. For each solution composition, the estimated AOT<sub>m</sub> and H<sub>2</sub>O<sub>m</sub> values were average results calculated from both experiments carried out with or without shaker.

**Table S19.** HPLC average peak areas, observed and normalized (subscript N) product yields for dediazonation reaction of 16-ArN<sub>2</sub><sup>+</sup> in solutions of 15 mM AOT in the present of 5-50 mM sodium salicylate **NaSal**, estimated interfacial molarities of headgroup, AOT<sub>m</sub>, water, H<sub>2</sub>O<sub>m</sub>, and their molar ratio, H<sub>2</sub>O<sub>m</sub>/AOT<sub>m</sub>, at 28°C. [HBr] = 1 mM.<sup>a</sup>

| [NaSal]<br>(mM) | Shaker <sup>b</sup> | Peak Areas (10 <sup>6</sup> μv•s) <sup>c</sup> |        | Observed Yields (%) |        |       | Normalized Yields (%) <sup>d</sup> |                     | AOT <sub>m</sub> <sup>e</sup><br>(M) | H <sub>2</sub> O <sub>m</sub> <sup>e</sup><br>(M) | H <sub>2</sub> O <sub>m</sub> /AOT <sub>m</sub> <sup>e</sup> |
|-----------------|---------------------|------------------------------------------------|--------|---------------------|--------|-------|------------------------------------|---------------------|--------------------------------------|---------------------------------------------------|--------------------------------------------------------------|
|                 |                     | 16-ArOH                                        | 16-ArS | 16-ArOH             | 16-ArS | Total | 16-ArOH <sub>N</sub>               | 16-ArS <sub>N</sub> |                                      |                                                   |                                                              |
| 5               | Yes                 | 4.36                                           | 0.67   | 79.9                | 8.8    | 88.7  | 90.0                               | 10.0                | 1.09                                 | 44.31                                             | 40.5                                                         |
| 5               | No                  | 4.51                                           | 0.67   | 82.6                | 8.8    | 91.4  | 90.4                               | 9.6                 |                                      |                                                   |                                                              |
| 7               | Yes                 | 4.02                                           | 0.62   | 73.7                | 8.2    | 81.9  | 90.0                               | 10.0                | 1.11                                 | 44.18                                             | 39.9                                                         |
| 7               | No                  | 4.47                                           | 0.67   | 81.9                | 8.9    | 90.7  | 90.2                               | 9.8                 |                                      |                                                   |                                                              |
| 9               | Yes                 | 4.22                                           | 0.67   | 77.2                | 8.9    | 86.1  | 89.7                               | 10.3                | 1.13                                 | 44.00                                             | 39.1                                                         |
| 9               | No                  | 4.42                                           | 0.67   | 80.9                | 8.8    | 89.8  | 90.2                               | 9.8                 |                                      |                                                   |                                                              |
| 13              | Yes                 | 4.20                                           | 0.70   | 76.9                | 9.3    | 86.2  | 89.2                               | 10.8                | 1.19                                 | 43.33                                             | 36.3                                                         |
| 13              | No                  | 4.35                                           | 0.72   | 79.6                | 9.4    | 89.1  | 89.4                               | 10.6                |                                      |                                                   |                                                              |
| 15              | Yes                 | 4.12                                           | 0.82   | 75.5                | 10.8   | 86.2  | 87.5                               | 12.5                | 1.40                                 | 41.31                                             | 29.6                                                         |
| 15              | No                  | 4.21                                           | 0.84   | 77.0                | 11.1   | 88.1  | 87.4                               | 12.6                |                                      |                                                   |                                                              |
| 20              | Yes                 | 3.88                                           | 1.02   | 71.1                | 13.5   | 84.6  | 84.1                               | 15.9                | 1.77                                 | 37.67                                             | 21.3                                                         |
| 20              | No                  | 4.01                                           | 1.04   | 73.4                | 13.7   | 87.2  | 84.2                               | 15.8                |                                      |                                                   |                                                              |
| 30              | Yes                 | 3.76                                           | 1.08   | 68.9                | 14.2   | 83.1  | 82.9                               | 17.1                | 1.89                                 | 36.42                                             | 19.2                                                         |
| 30              | No                  | 3.80                                           | 1.08   | 69.6                | 14.2   | 83.8  | 83.1                               | 16.9                |                                      |                                                   |                                                              |
| 50              | Yes                 | 3.86                                           | 1.08   | 70.6                | 14.2   | 84.9  | 83.2                               | 16.8                | 1.86                                 | 36.71                                             | 19.7                                                         |
| 50              | No                  | 3.81                                           | 1.06   | 69.7                | 14.0   | 83.7  | 83.3                               | 16.7                |                                      |                                                   |                                                              |

a. Reaction time ca. 48 hours. Prior to HPLC analysis, the product mixture was mixed with an equal volume of water. The final concentrations of 16-ArN<sub>2</sub><sup>+</sup> were ca. 5.5 x 10<sup>-5</sup> M.

b. The reaction tubes were either placed in a thermostated shaker or water bath.

c. 100 μL sample injections. Peak areas are average of triplicate or duplicate injections. Eluting solvents: 65%MeOH/35%*i*-PrOH; Flow rate: 0.4 mL/min; Detector wavelength: 220 nm.

d. % 16-ArS<sub>N</sub> = 100 (%16-ArS)/(%16-ArOH + %16-ArS); % 16-ArOH<sub>N</sub> = 100 (%16-ArOH)/(%16-ArOH + %16-ArS).

e. For each solution composition, the estimated AOT<sub>m</sub> and H<sub>2</sub>O<sub>m</sub> values were average results calculated from both experiments carried out with or without shaker.

## References:

1. G.V. Srilakshmi and A. Chaduri, Chem. – *Eur. J.*, 2015, **6**, 2847-2853.
2. Y.Zhang, L.S. Romsted, L. Zhuang and J.S. De. *Langmuir*, 2013, **29**, 54-544.
